# Supplementary material
Source: Elsevier journal article supplement (https://www.sciencedirect.com/science/article/pii/S1579212919303489)
Supplement: mmc1 [file S1579212919303489:mmc1.pdf]

## **Material suplementario**

**Título: La disfunción de las pequeñas vías aéreas deteriora la calidad de vida de fumadores  
sin limitación al flujo aéreo**

## **MÉTODOS (Versión expandida)**

### **Sujetos del estudio**

En las consultas de deshabituación tabáquica de nuestro centro, se seleccionaron de forma consecutiva 53 fumadores activos sin evidencia de limitación al flujo aéreo y 20 fumadores activos con limitación al flujo aéreo. En ambos casos, los sujetos debían tener de 40 a 70 años y un consumo de tabaco acumulado medio de al menos 20 paquetes x año. Como grupo control, se seleccionaron 20 sujetos de 40 a 70 años del grupo de referencia de nuestro laboratorio (nunca fumadores, sin síntomas respiratorios ni cardíacos en el cuestionario de la Comunidad Europea del Carbón y el Acero, sin tratamiento respiratorio o cardíaco previo y con exploración física, radiografía de tórax y electrocardiograma normales). En los tres grupos, se consideraron criterios de exclusión: mujeres en edad fértil que no utilicen un sistema de anticoncepción eficaz; tratamiento con glucocorticoides sistémicos o inhalados de partícula ultrafina en los últimos 2 meses; infección respiratoria en las tres semanas previas; diagnóstico previo de asma, tuberculosis, enfermedad pulmonar intersticial difusa, enfermedad vascular pulmonar, enfermedad pleural, enfermedad de la caja torácica o cualquier otra enfermedad respiratoria crónica distinta de la EPOC; o enfermedad cardiovascular, metabólica o neoplásica conocida. El estudio fue aprobado por el Comité de Ética de Investigación del Hospital Universitario La Paz (PI-1261) y todos los participantes firmaron su consentimiento informado.

### **Cuestionarios**

En los sujetos fumadores, se utilizaron los test de Fagerström y Glover-Nilsson. En la totalidad de sujetos del estudio, la calidad de vida relacionada con la salud fue evaluada mediante la autoadministración de la versión española de los cuestionarios genéricos *Short Form 36 Health Survey* (SF-36)<sup>1</sup> y *European Quality of Life-5 Dimensions* (EQ-5D).<sup>2</sup>

### **Tomografía computarizada torácica**

Se realizó una tomografía computarizada de tórax de alta resolución (TCAR) volumétrica, en inspiración y espiración máximas, mediante un equipo de 16 detectores (Somatom Emotion 16, Siemens Medical Solutions, Erlangen, Alemania), según se ha descrito previamente.<sup>3</sup> Los parámetros de irradiación se ajustaron de forma convencional con respecto a las características morfológicas de cada sujeto (120 kV, con corriente del tubo de 160 mA). El grosor de corte utilizado fue de 0,75 mm, con un incremento de reconstrucción de 0,5 mm, una relación de paso en el barrido espiral (“pitch”) de 0,8 y un grosor de colimación de 0,6 mm. El equipo permite una colimación de  $16 \times 0,75$  mm, con un desplazamiento de mesa de 30 mm por rotación del tubo y un tiempo de rotación del tubo de  $360^\circ$  en 0,6 segundos. En todos los casos, se utilizaron dos algoritmos de reconstrucción estándar (FILTRO B41 para la valoración de las partes blandas y B90 de alta resolución para mejor evaluación del parénquima pulmonar). El post-procesado de los datos se realizó en una consola de reconstrucción independiente (Leonardo, Siemens) utilizando un programa de análisis semiautomático (Software syngo InSpace4D, Siemens). Tanto en inspiración como en espiración, se determinó la densidad pulmonar media (MLD o *medium lung density*) así como el porcentaje de vóxeles con valores de atenuación por debajo de -950 unidades Hounsfield (UH) (LAV o *Low Attenuation Level*) o entre -1.000 a -951 UH (subrango 1) y el umbral de atenuación del parénquima pulmonar correspondiente al percentil 15 (P15).

### **Función respiratoria**

Todas las pruebas fueron realizadas por una única investigadora (CGQ), utilizando un equipo MasterScreen (Viasys Healthcare, Würzburg, Alemania) con neumotacógrafo calefactado tipo Lilly. Para evitar los efectos de las espiraciones forzadas sobre el tono del músculo liso de las vías respiratorias, la oscilometría de impulsos (IOS) se realizó antes que la espirometría. Se llevó a cabo una calibración diaria a diferentes flujos, utilizando una jeringa de 3 litros y la exactitud de

las medidas de resistencia se confirmó diariamente utilizando una malla de resistencia estándar de 0,2 kPa/l/s.

La IOS se realizó según las recomendaciones vigentes.<sup>4</sup> Se solicitó a los participantes que, con una pinza nasal y sentados con la cabeza en una posición neutral, respiraran a volumen corriente con los labios sellados alrededor de una boquilla mientras apretaban firmemente sus mejillas con las manos. Al menos, se realizaron tres registros aceptables (valores de coherencia a 5 y 20 Hz  $\geq 0.7$  y 0.9, respectivamente) con una duración de 30 segundos, utilizando para el análisis el promedio de tres pruebas aceptables y repetibles (variabilidad  $<10\%$ ). Como índices de resistencia total y proximal de las vías aéreas, se utilizaron las resistencias respiratorias a 5 y 20 Hz (R5 y R20), mientras que la caída en la resistencia de 5 a 20 Hz (R5-R20) fue considerada un indicador de la resistencia de las vías aéreas periféricas. Además, se determinó la reactancia a 5 Hz (X5) y el índice de área de reactancia de baja frecuencia (AX) como marcadores representativos de la función de las vías respiratorias periféricas. Los datos obtenidos fueron interpretados en función de los valores de referencia europeos de Oostveen.<sup>5</sup>

Inmediatamente después de la determinación de la IOS, se realizó una espirometría pre- y post-broncodilatador, según la normativa vigente<sup>6</sup> y se utilizaron las ecuaciones *Global Lung Function Initiative* para obtener los valores de referencia.<sup>7</sup>

### **Clasificación de los pacientes**

Se definió limitación al flujo aéreo (LFA) compatible con un diagnóstico de EPOC como un FEV<sub>1</sub>/FVC post-broncodilatador menor del límite inferior de la normalidad.<sup>23</sup> La disfunción de la pequeña vía (DPV) fue definida por la presencia de una R5, R5-R20 y AX mayores de su límite superior de la normalidad.<sup>24</sup> En ausencia de LFA y DPV, los sujetos fueron considerados control. Según estos criterios, los sujetos del estudio fueron clasificados en cuatro grupos mutuamente excluyentes: no fumadores control, fumadores sin DPV, fumadores con DPV y fumadores con

LFA. Por último, los pacientes con LFA fueron clasificados por gravedad de la misma, grupo de riesgo y fenotipo de EPOC, según las recomendaciones vigentes<sup>25,26</sup>.

### **Análisis estadístico**

La estimación del tamaño muestral se realizó en función de una puntuación de la escala del componente físico del cuestionario SF-36 de  $49,0 \pm 4,7$  obtenida en un estudio piloto en fumadores sin LFA (datos no publicados). Para detectar una diferencia de al menos 5 unidades, mediante contraste bilateral, con un riesgo alfa de 0,05 y un riesgo beta de 0,10, se necesitarían 20 sujetos por cada grupo. Para determinar el tamaño del grupo de fumadores sin LFA se consideró un estudio previo,<sup>8</sup> que refirió una prevalencia de DPV del 26,3% entre fumadores o exfumadores con cardiopatía isquémica, que alcanzó el 38% en fumadores activos. Según esto, para obtener dos subgrupos de fumadores sin LFA comparables en función de la existencia o no de DPV, se necesitarían 53 sujetos.

Los datos se presentan como número (porcentaje) o media  $\pm$  desviación estándar, según sus características y una vez comprobado su ajuste a la distribución normal, mediante la prueba de Shapiro-Wilk. Para las comparaciones entre grupos se utilizó la prueba de chi-cuadrado y el análisis de varianza con comparaciones múltiples post-hoc mediante la prueba de Bonferroni. La relación entre variables fue evaluada utilizando el análisis de correlación de Pearson. Aquellas variables que alcanzaron una relación significativa, fueron introducidas en un análisis de regresión lineal múltiple, que utilizó el método de pasos escalonados hacia delante para incluir o retirar variables independientes en cada paso, en función de una probabilidad de F (entrada: 0,05; retirada: 0,10) y considerando la distribución de los residuales y la homogeneidad de la varianza. Un valor de p menor de 0,05 fue considerado significativo y todos los análisis fueron realizados con el programa Statistical Package for the Social Sciences 15.0 (SPSS Inc., Chicago, IL, USA).

## REFERENCIAS

1. Vilagut G, Valderas JM, Ferrer M, Garin O, López-García E, Alonso J. Interpretation of SF-12 and SF-36 questionnaires in Spain: physical and mental components. *Med Clin (Barc)*. 2008;**130**:726-35.
2. Badia X, Roset M, Montserrat S, Herdman M, Segura A. La versión española del EUROQoL: descripción y aplicaciones. *Med Clin (Barc)* 1999; **112** (suppl. 1): 79-85.
3. García-Río F, Romero D, Lores V, Casitas R, Hernanz A, Galera R, Alvarez-Sala R, Torres I. Dynamic hyperinflation, arterial blood oxygen, and airway oxidative stress in stable patients with COPD. *Chest* 2011;**140**:961-969.
4. Oostveen E, MacLeod D, Lorino H, Farré R, Hantos Z, Desager K, Marchal F. The forced oscillation technique in clinical practice: methodology, recommendations and future developments. *Eur Respir J* 2003;**22**:1026-1041.
5. Oostveen E, Boda K, van der Grinten CP, James AL, Young S, Nieland H, Hantos Z. Respiratory impedance in healthy subjects: baseline values and bronchodilator response. *Eur Respir J* 2013;**42**:1513-1523.
6. García-Río F, Calle M, Burgos F, Casan P, Del Campo F, Galdiz JB, Giner J, González-Mangado N, Ortega F, Puente Maestu L; Spanish Society of Pulmonology and Thoracic Surgery (SEPAR). Spirometry. *Arch Bronconeumol* 2013;**49**:388-401.
7. Quanjer PH, Stanojevic S, Cole TJ, Baur X, Hall GL, Culver BH, et al. Multi-ethnic reference values for spirometry for the 3-95-yr age range: the global lung function 2012 equations. *Eur Respir J* 2012;**40**:1324-1343.
8. Pellegrino R, Viegi G, Brusasco V, Crapo RO, Burgos F, Casaburi R, Coates A, van der Grinten CPM, Gustafsson P, Hankinson J, Jensen R, Johnson DC, MacIntyre N, McKay R, Miller MR, Navajas D, Pedersen OF, Wanger J. Interpretative strategies for lung function tests. *Eur Respir J* 2005;**26**:948-968

9. Friedman SM, Maslow CB, Ribman J, Pillai PS, Goldring RM, Farfel MR, et al. Case-control study of lung function in World Trade Center health registry area residents and workers. *Am J Respir Crit Care Med* 2011;**184**:582–589.
10. Vogelmeier CF, Criner GJ, Martínez FJ, Anzueto A, Barnes PJ, Bourbeau J, Celli BR, Chen R, Decramer M, Fabbri LM, Frith P, Halpin DM, López Varela MV, Nishimura M, Roche N, Rodríguez-Roisin R, Sin DD, Singh D, Stockley R, Vestbo J, Wedzicha JA, Agustí A. Global Strategy for the Diagnosis, Management, and Prevention of Chronic Obstructive Lung Disease 2017 Report: GOLD Executive Summary. *Arch Bronconeumol* 2017;**53**:128-149.
11. Miravittles M, Soler-Cataluña JJ, Calle M, Molina J, Almagro P, Quintano JA, Trigueros JA, Cosío BG, Casanova C, Antonio Riesco J, Simonet P, Rigau D, Soriano JB, Ancochea J. Spanish Guidelines for Management of Chronic Obstructive Pulmonary Disease (GesEPOC) 2017. Pharmacological Treatment of Stable Phase. *Arch Bronconeumol* 2017;**53**:324-335.
12. Llontop C, García-Quero C, Castro A, Dalmau R, Casitas R, Galera R, Iglesias A, Martínez-Ceron E, Soriano JB, García-Río F. Small airway dysfunction in smokers with stable ischemic heart disease. *PLoS One* 2017;**12**(8):e0182858.

**Tabla S1.** Características clínicas de los fumadores con limitación al flujo aéreo compatible con enfermedad pulmonar obstructiva crónica

| Características                 |                                   | Media $\pm$ desviación estándar o n (%) |
|---------------------------------|-----------------------------------|-----------------------------------------|
| Fenotipos clínicos              |                                   |                                         |
|                                 | Enfisema no exacerbador           | 11 (55%)                                |
|                                 | Bronquitis crónica no exacerbador | 4 (20%)                                 |
|                                 | Exacerbador enfisema              | 2 (10%)                                 |
|                                 | Exacerbador bronquitis crónica    | 2 (10%)                                 |
| Disnea (mMRC)                   |                                   | 0,84 $\pm$ 0,69                         |
| Gravedad limitación flujo aéreo |                                   |                                         |
|                                 | Moderada                          | 13 (68%)                                |
|                                 | Grave                             | 5 (21%)                                 |
|                                 | Muy grave                         | 2 (11%)                                 |
| Grupos de riesgo GOLD           |                                   |                                         |
|                                 | A                                 | 5 (25%)                                 |
|                                 | B                                 | 7 (35%)                                 |
|                                 | C                                 | 2 (10%)                                 |
|                                 | D                                 | 5 (25%)                                 |
| Cuestionario CAT                |                                   | 13,8 $\pm$ 8,2                          |

Abreviaturas: mMRC=escala modificada del *Medical Research Council*; GOLD=*Global Initiative for Chronic Obstructive Lung Disease*; CAT=*COPD Assessment Test*.



**Tabla S2.** Características antropométricas de los sujetos reclutados

|                                            | No fumadores<br>(n=20) | Fumadores sin<br>limitación flujo aéreo<br>(n=53) | Fumadores con<br>LFA<br>(n=20) | p     |
|--------------------------------------------|------------------------|---------------------------------------------------|--------------------------------|-------|
| Sexo                                       |                        |                                                   |                                | 0,725 |
| Mujer                                      | 15 (75%)               | 39 (74%)                                          | 13 (65%)                       |       |
| Hombre                                     | 5 (25%)                | 14 (26%)                                          | 7 (35%)                        |       |
| Edad, años                                 | 55 ± 6                 | 52 ± 6                                            | 53 ± 6                         | 0,159 |
| Talla, cm                                  | 163 ± 6                | 164 ± 9                                           | 164 ± 8                        | 0,977 |
| Peso, Kg                                   | 69 ± 10                | 69 ± 13                                           | 70 ± 13                        | 0,877 |
| Índice de masa corporal, Kg/m <sup>2</sup> | 25,6 ± 3,1             | 25,7 ± 4,2                                        | 26,3 ± 4,2                     | 0,830 |
